# Supplementary material for: Limited immune surveillance in lymphoid tissue by cytolytic CD4+ T cells during health and HIV disease
Source: PubMed Central journal article supplement (PMC5919077; doi:10.1371/journal.ppat.1006973), 2018-04-13
Supplement: ppat.1006973.s001.pdf [file ppat.1006973.s001.pdf]

S1 Table. Patient table. Clinical characteristics of patients.

|                                     | <b>HIV-</b>                                                                        | <b>HIV+ acute/early infection</b>                      | <b>HIV+ chronic ART-</b>                                      | <b>HIV+ chronic ART+</b>                                      | <b>HIV elite controllers</b>       |
|-------------------------------------|------------------------------------------------------------------------------------|--------------------------------------------------------|---------------------------------------------------------------|---------------------------------------------------------------|------------------------------------|
| Number of individuals               | 51                                                                                 | 17                                                     | 71                                                            | 25                                                            | 18                                 |
| Sites of collection                 | University of Pennsylvania, Case Western Reserve University, Karolinska Institutet | INER-CIENI, RV217                                      | University of Pennsylvania, INER-CIENI, Karolinska Institutet | University of Pennsylvania, INER-CIENI, Karolinska Institutet | UCSF, Karolinska Institutet        |
| Types of tissues                    | Matched blood and LN (n=13)<br>Only blood (n=32)<br>Only LN (n=6)                  | Matched blood and LN (n=8)<br>Longitudinal blood (n=9) | Matched blood and LN (n=19)<br>Only blood (n=52)              | Matched blood and LN (n=13)<br>Only blood (n=12)              | Only blood (n=10)<br>Only LN (n=8) |
| Age <sup>a</sup>                    | N/A                                                                                | 24 (22-30) <sup>b</sup>                                | 29 (23-33)                                                    | 29 (28-39)                                                    | 49 (39-63)                         |
| CD4 count (cells/mL) <sup>a</sup>   | N/A                                                                                | 306 (238-370) <sup>b</sup>                             | 348 (248-497)                                                 | 382 (367-811)                                                 | 835 (643-1111)                     |
| Viral load (copies/mL) <sup>a</sup> | 0                                                                                  | 1,996,027 (1,297,461-4,421,034) <sup>b</sup>           | 75,043 (22,429-203,904)                                       | <40 (<40-230,948)                                             | <40 (<40-<40)                      |

<sup>a</sup> Median and IQR

<sup>b</sup> Values for cross-sectional cohort on matched LN and blood
