# Supplementary figures and images for: Limited immune surveillance in lymphoid tissue by cytolytic CD4+ T cells during health and HIV disease
Source: PubMed Central journal article supplement (PMC5919077; doi:10.1371/journal.ppat.1006973), 2018-04-13

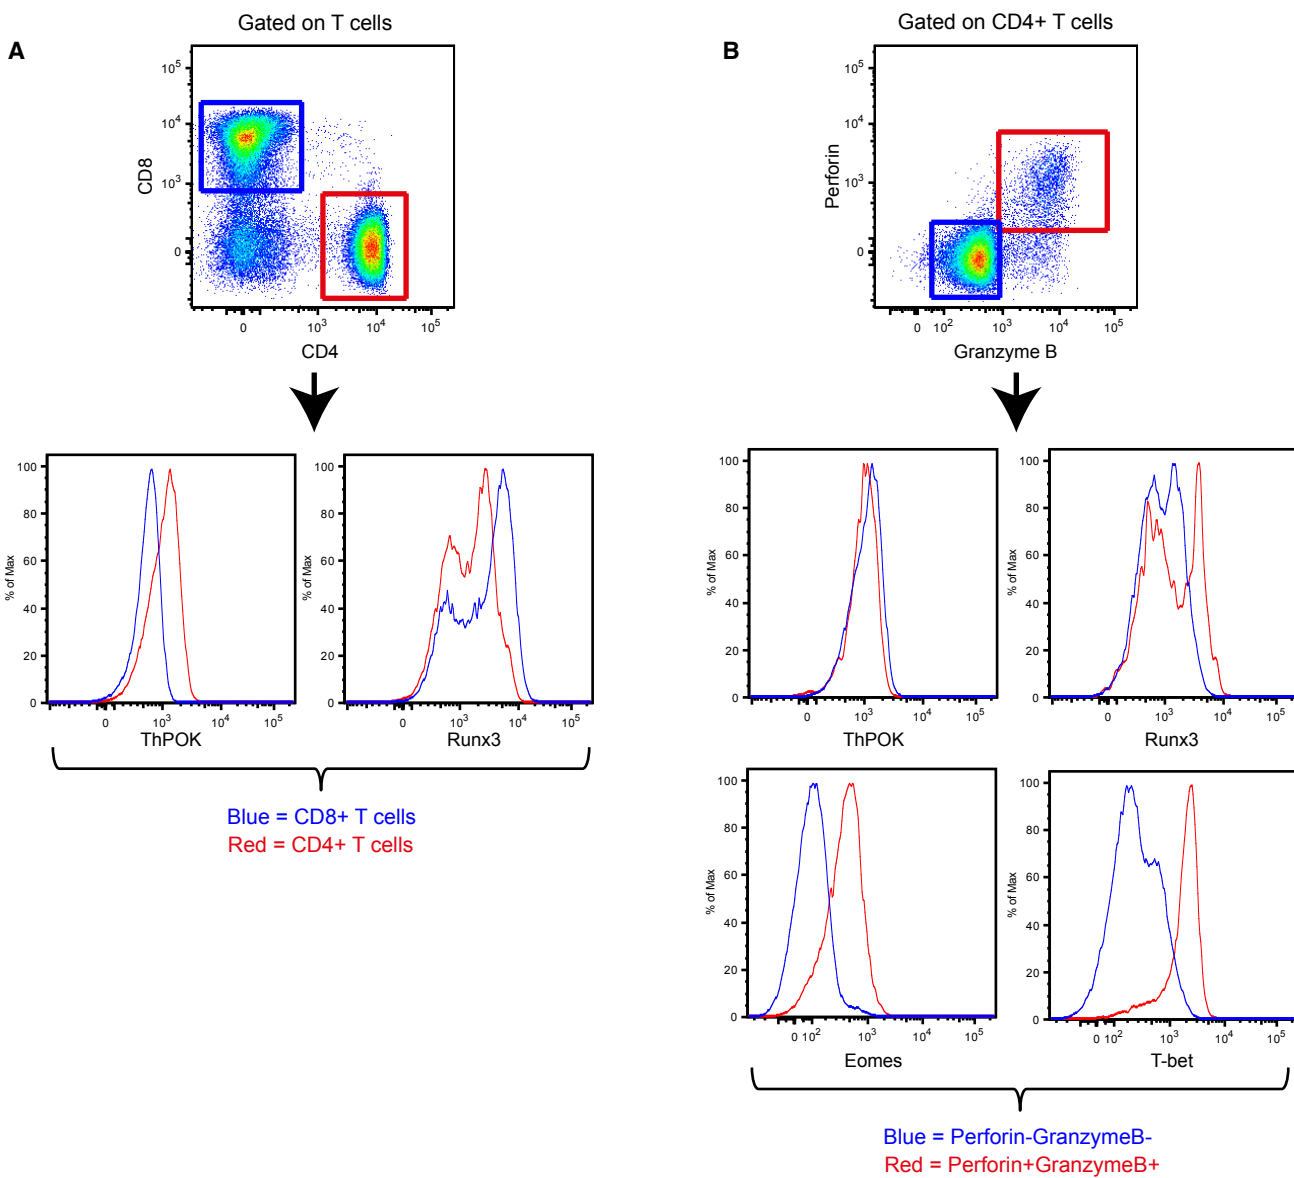

Supplement: ppat.1006973.s002.pdf [file ppat.1006973.s002.pdf]

S2 Fig

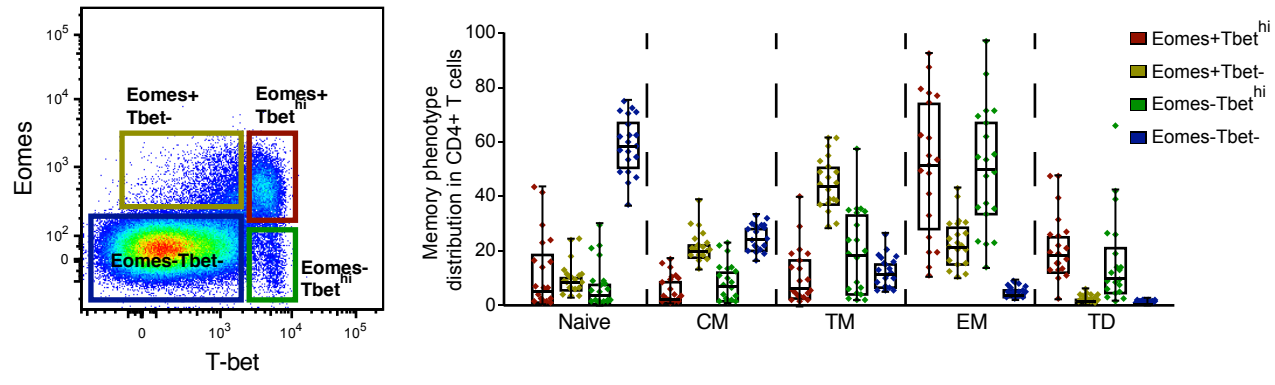

Supplement: ppat.1006973.s003.pdf [file ppat.1006973.s003.pdf]

A

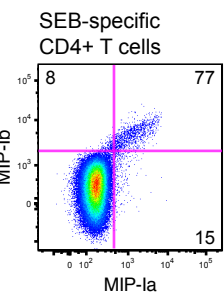

B

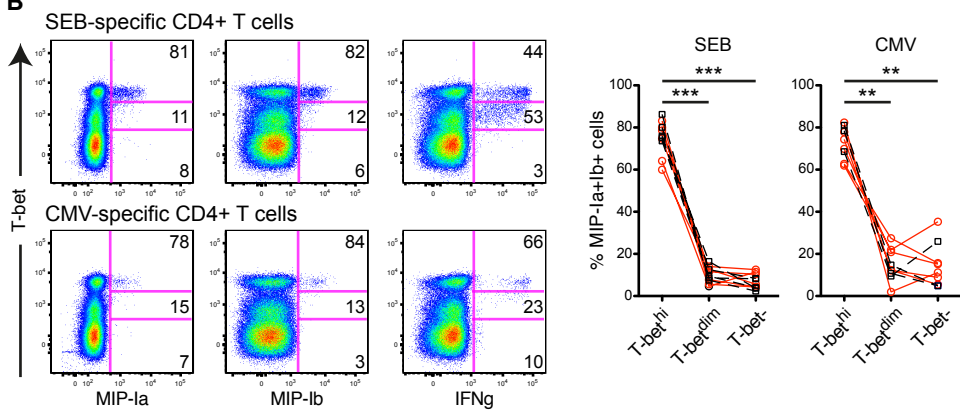

C

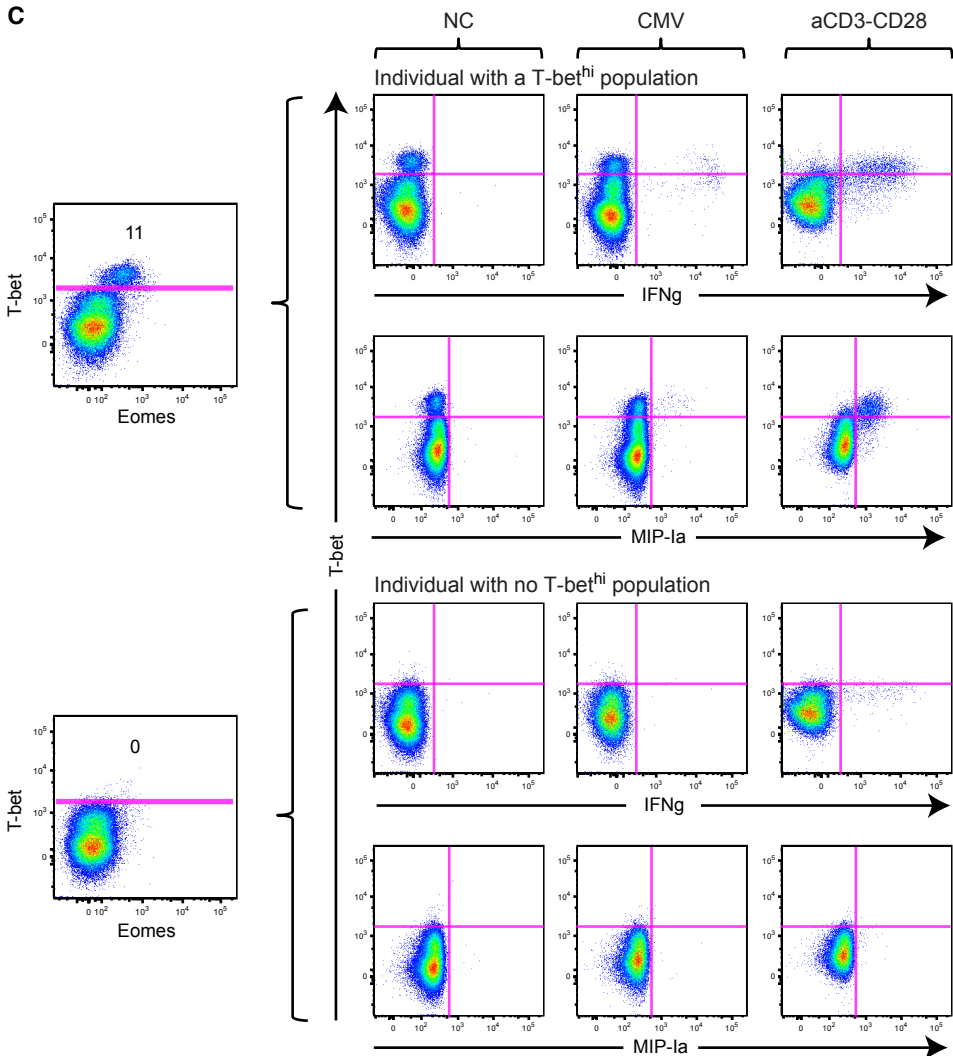

Supplement: ppat.1006973.s004.pdf [file ppat.1006973.s004.pdf]

**A**

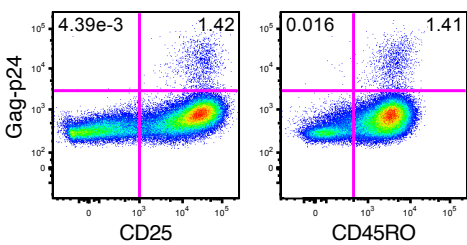

**B**

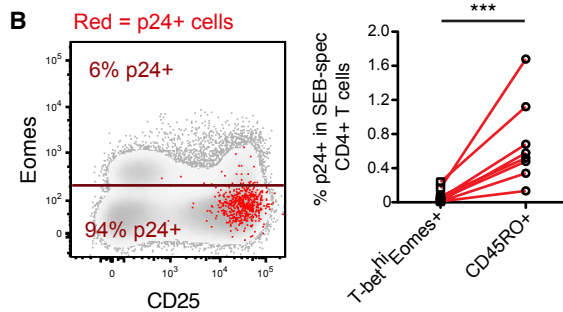

Supplement: ppat.1006973.s005.pdf [file ppat.1006973.s005.pdf]

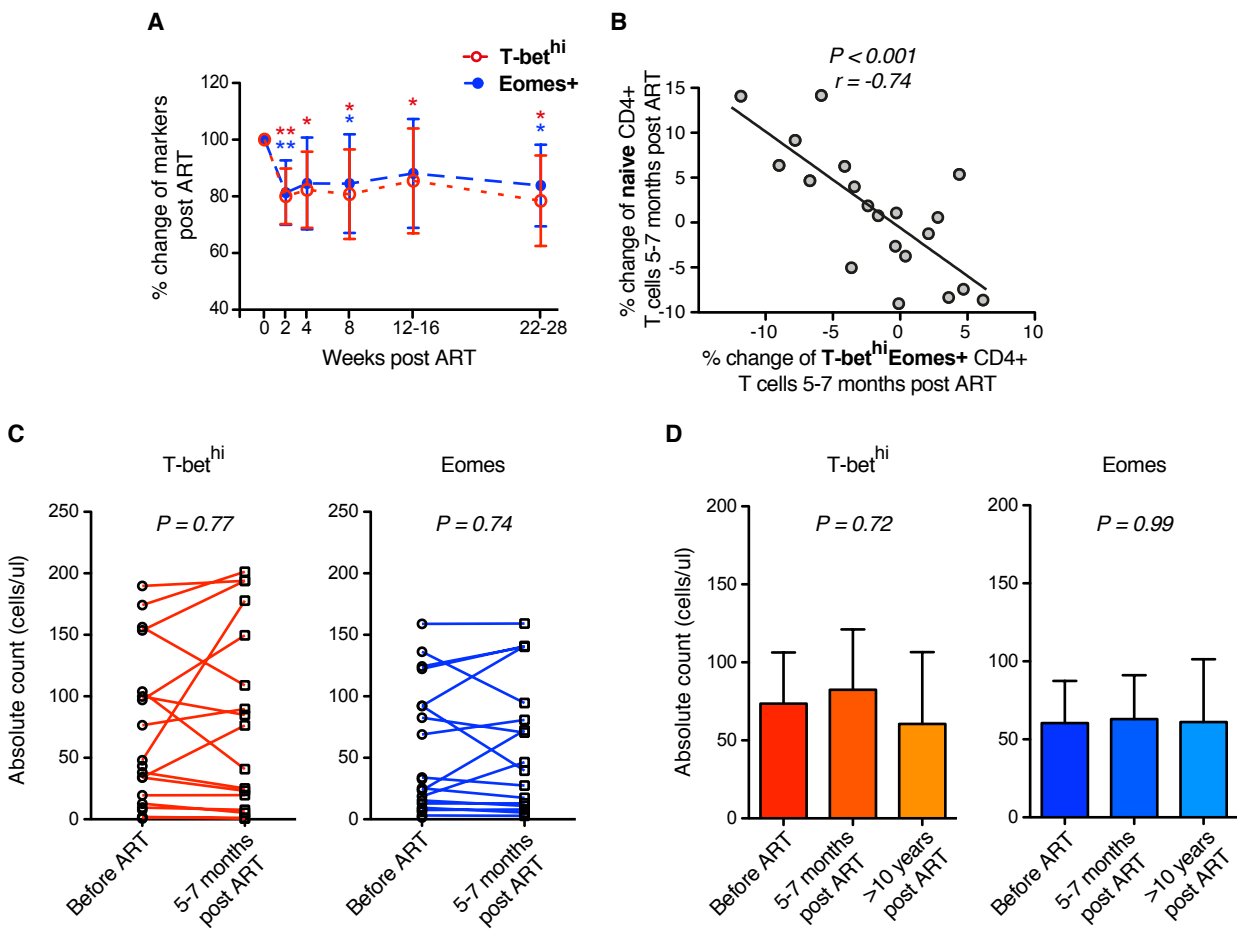

Supplement: ppat.1006973.s006.pdf [file ppat.1006973.s006.pdf]

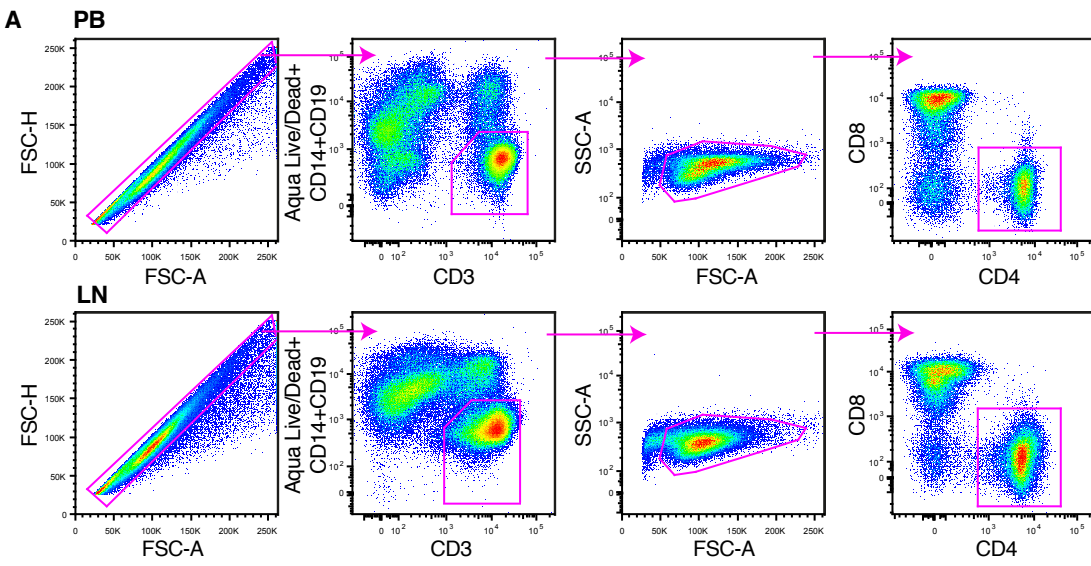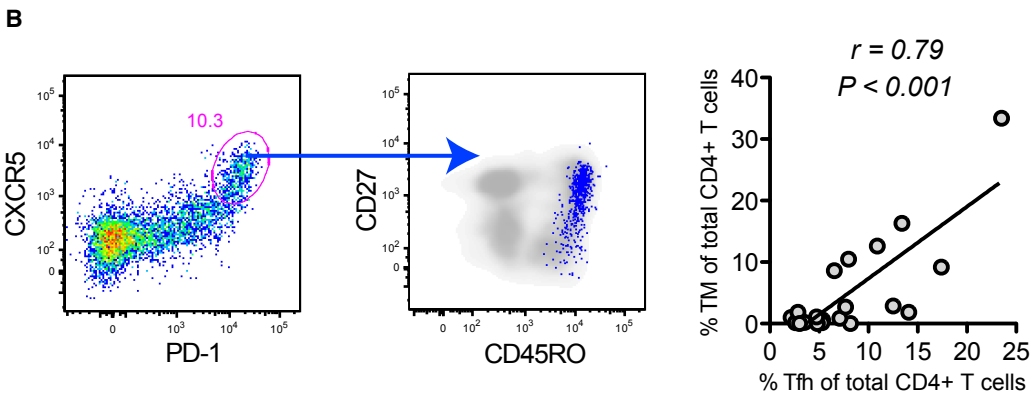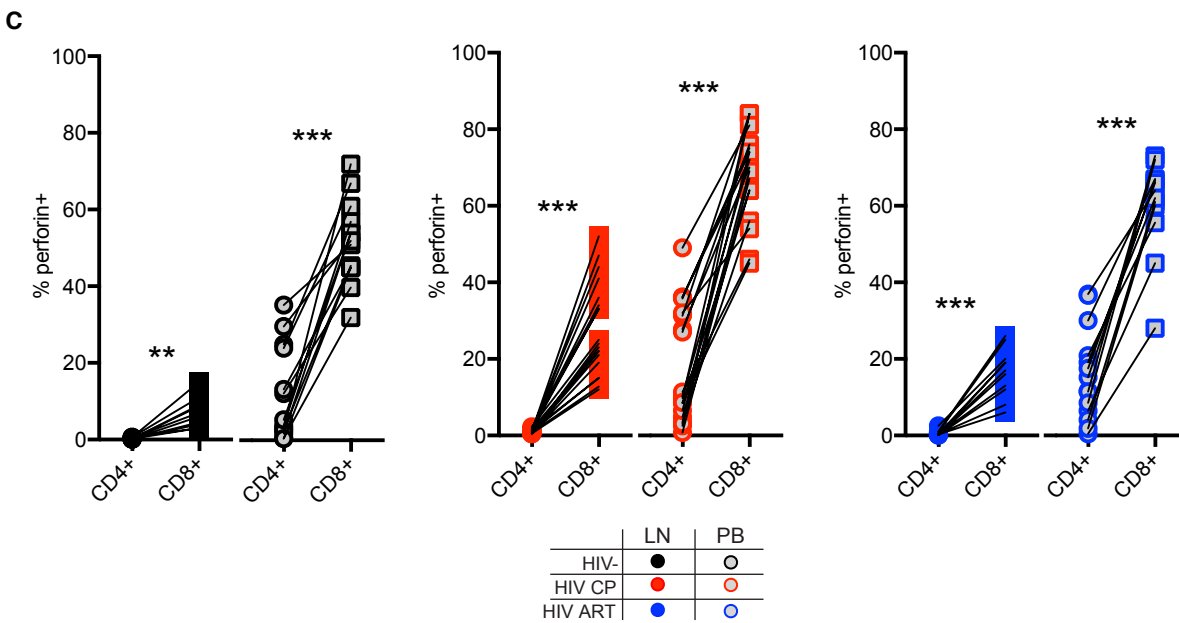

Supplement: ppat.1006973.s008.pdf [file ppat.1006973.s008.pdf]

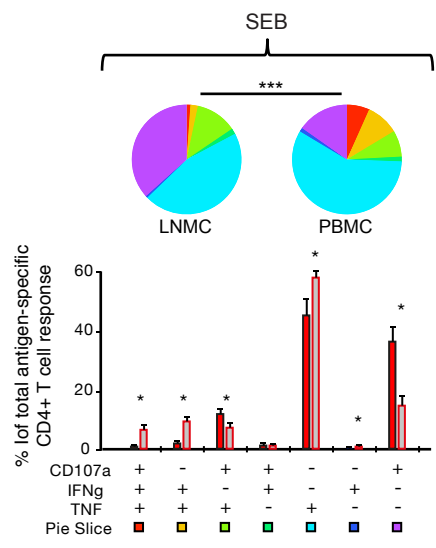

Supplement: ppat.1006973.s009.pdf [file ppat.1006973.s009.pdf]

**A**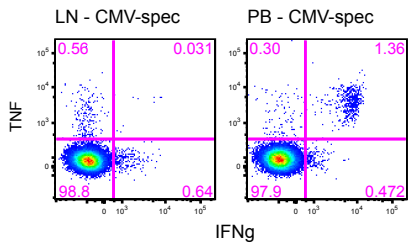**B**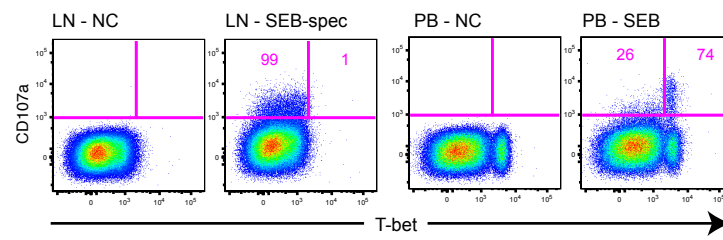**C**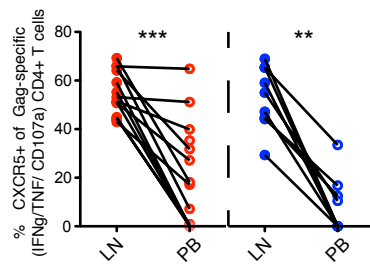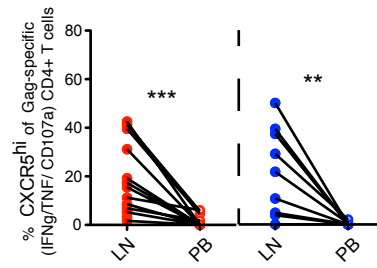

|         | LN | PB |
|---------|----|----|
| HIV CP  | ●  | ○  |
| HIV ART | ●  | ○  |

Supplement: ppat.1006973.s010.pdf [file ppat.1006973.s010.pdf]

S10 Fig

Sorting strategy for single cell analysis

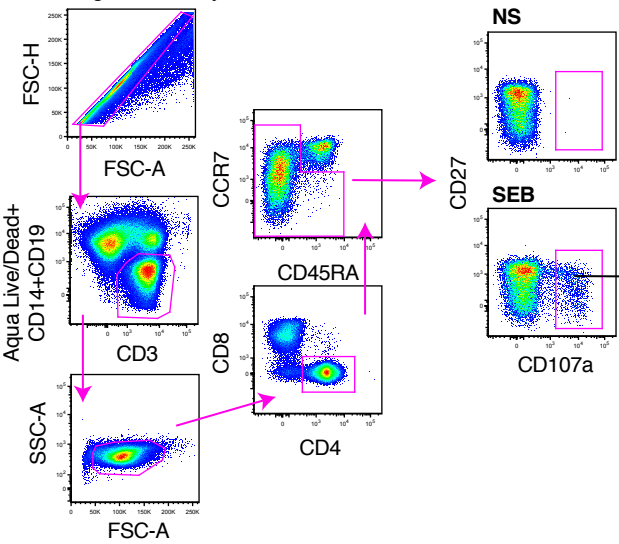

Single-cell Biomark analysis

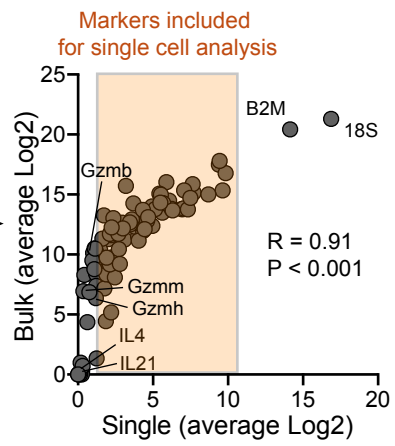

Supplement: ppat.1006973.s011.pdf [file ppat.1006973.s011.pdf]
